# Supplementary material for: Opioids Diminish the Placebo Antidepressant Response: A Post Hoc Analysis of a Randomized Controlled Ketamine Trial
Source: bioRxiv or medRxiv preprint supplement (doi:10.1101/2024.09.24.24314243), 2024-11-02
Supplement: Supplementary file [file media-1.pdf]

### Supplemental Figure 1.

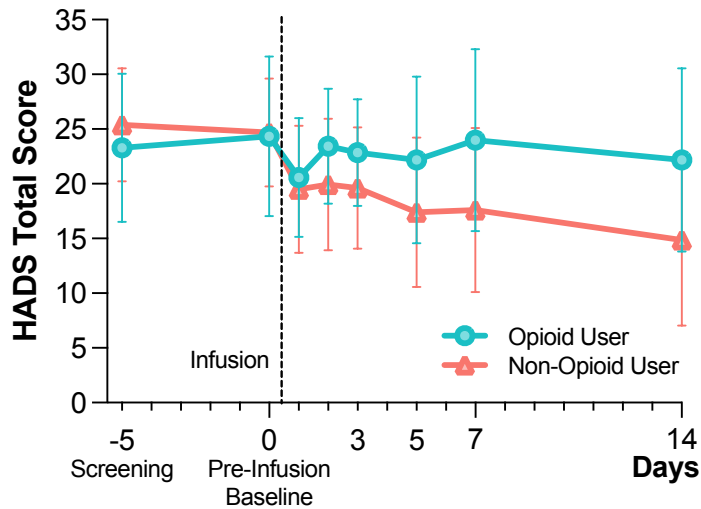

### Caption for Supplemental Figure 1.

#### Impact of Baseline Opioid Use on HADS Scores in the Placebo Group

Baseline opioid use was associated with a smaller antidepressant response to placebo, as measured by the HADS (Hospital Anxiety and Depression Scale), a secondary self-report measure of mood that de-emphasizes somatic symptoms and is specifically validated on hospitalized patients. Mean and standard deviation scores are displayed. HADS total scores range from 0-42, with higher scores indicating greater anxiety and depression symptoms.
