# Supplementary material for: Opioids Diminish the Placebo Antidepressant Response: A Post Hoc Analysis of a Randomized Controlled Ketamine Trial
Source: bioRxiv or medRxiv preprint supplement (doi:10.1101/2024.09.24.24314243), 2024-11-02
Supplement: Supplementary file [file media-2.pdf]

**Supplemental Table 1. Model Estimates****Model for post-treatment MADRS scores (placebo arm)**

|                                    | <b>Estimate (SE)</b> | <b>95% CI</b> | <b>t-value</b> | <b>p-value</b> |
|------------------------------------|----------------------|---------------|----------------|----------------|
| Intercept                          | -2.86 (10.1)         | -22.7 to 17.0 | -0.28          | 0.777          |
| Group (baseline opioid use status) | 10.1 (4.73)          | 0.81 to 19.4  | 2.13           | 0.033*         |
| Time                               | -0.07 (0.17)         | -0.40 to 0.27 | -0.39          | 0.699          |
| Group×Time                         | 0.24 (0.29)          | -0.32 to 0.79 | 0.83           | 0.409          |
| Baseline MADRS score               | 0.70 (0.31)          | 0.09 to 1.31  | 2.26           | 0.024*         |
| Baseline pain intensity            | -1.34 (0.74)         | -2.78 to 0.11 | -1.81          | 0.070          |
| Postoperative pain intensity       | 0.50 (0.42)          | -0.33 to 1.33 | 1.18           | 0.239          |
| Ethnicity                          | -9.21 (9.22)         | -27.3 to 8.87 | -1.00          | 0.318          |

**Model for % change in MADRS scores (placebo arm)**

|                                    | <b>Estimate (SE)</b> | <b>95% CI</b>  | <b>t-value</b> | <b>p-value</b> |
|------------------------------------|----------------------|----------------|----------------|----------------|
| Intercept                          | -43.8 (12.7)         | -68.7 to -19.0 | -3.46          | 0.001*         |
| Group (baseline opioid use status) | 38.4 (15.2)          | 8.59 to 68.2   | 2.53           | 0.012*         |
| Time                               | -0.15 (0.56)         | -1.25 to 0.95  | -0.27          | 0.789          |
| Group×Time                         | 0.54 (0.95)          | -1.33 to 2.41  | 0.57           | 0.570          |
| Baseline pain intensity            | -3.81 (2.40)         | -8.51 to 0.89  | -1.59          | 0.112          |
| Postoperative pain intensity       | 1.75 (1.42)          | -1.02 to 4.52  | 1.24           | 0.216          |
| Ethnicity                          | -34.4 (30.0)         | -93.1 to 24.3  | -1.15          | 0.251          |

**Model for post-treatment MADRS scores (ketamine arm)**

|                                    | <b>Estimate (SE)</b> | <b>95% CI</b> | <b>t-value</b> | <b>p-value</b> |
|------------------------------------|----------------------|---------------|----------------|----------------|
| Intercept                          | -2.30 (7.15)         | -16.3 to 11.7 | -0.32          | 0.748          |
| Group (baseline opioid use status) | 2.63 (3.87)          | -4.96 to 10.2 | 0.68           | 0.497          |
| Time                               | 0.31 (0.20)          | -0.09 to 0.70 | 1.52           | 0.127          |
| Group×Time                         | -0.11 (0.28)         | -0.67 to 0.44 | -0.40          | 0.686          |
| Baseline MADRS score               | 0.50 (0.23)          | 0.05 to 0.95  | 2.19           | 0.029*         |
| Baseline pain intensity            | -0.87 (1.22)         | -3.26 to 1.52 | -0.72          | 0.474          |
| Postoperative pain intensity       | 1.11 (0.63)          | -0.13 to 2.34 | 1.75           | 0.079          |
| Ethnicity                          | 4.99 (6.14)          | -7.03 to 17.0 | 0.81           | 0.416          |

**Model for % change in MADRS scores (ketamine arm)**

|                                    | <b>Estimate (SE)</b> | <b>95% CI</b> | <b>t-value</b> | <b>p-value</b> |
|------------------------------------|----------------------|---------------|----------------|----------------|
| Intercept                          | -57.9 (21.5)         | -100 to -15.7 | -2.69          | 0.007*         |
| Group (baseline opioid use status) | 2.92 (14.5)          | -25.5 to 31.3 | 0.20           | 0.840          |
| Time                               | 0.47 (0.84)          | -1.18 to 2.11 | 0.55           | 0.579          |
| Group×Time                         | 0.29 (1.18)          | -2.02 to 2.60 | 0.25           | 0.806          |
| Baseline pain intensity            | -2.66 (4.25)         | -11.0 to 5.68 | -0.62          | 0.532          |
| Postoperative pain intensity       | 4.43 (2.58)          | -0.63 to 9.49 | 1.72           | 0.086          |
| Ethnicity                          | 19.2 (22.5)          | -24.9 to 63.4 | 0.85           | 0.393          |

**Model for post-treatment HADS scores (placebo arm)**

|                                    | <b>Estimate (SE)</b> | <b>95% CI</b>  | <b>t-value</b> | <b>p-value</b> |
|------------------------------------|----------------------|----------------|----------------|----------------|
| Intercept                          | 14.3 (6.93)          | 0.71 to 27.9   | 2.06           | 0.039*         |
| Group (baseline opioid use status) | 2.41 (3.60)          | -4.64 to 9.46  | 0.67           | 0.502          |
| Time                               | -0.36 (0.10)         | -0.55 to -0.16 | -3.61          | <0.001*        |
| Group×Time                         | 0.41 (0.17)          | 0.08 to 0.74   | 2.45           | 0.014*         |

|                                                        |                      |                |                |                |
|--------------------------------------------------------|----------------------|----------------|----------------|----------------|
| Baseline HADS                                          | 0.24 (0.27)          | -0.29 to 0.76  | 0.88           | 0.379          |
| Baseline pain intensity                                | -0.36 (0.58)         | -1.50 to 0.78  | -0.62          | 0.533          |
| Postoperative pain intensity                           | 0.47 (0.25)          | -0.02 to 0.96  | 1.90           | 0.058          |
| Ethnicity                                              | -3.23 (7.06)         | -17.1 to 10.6  | -0.46          | 0.648          |
| <b>Model for % change in HADS scores (placebo arm)</b> |                      |                |                |                |
|                                                        | <b>Estimate (SE)</b> | <b>95% CI</b>  | <b>t-value</b> | <b>p-value</b> |
| Intercept                                              | 36.9 (25.2)          | -12.6 to 86.3  | 1.46           | 0.144          |
| Group (baseline opioid use status)                     | 16.1 (13.2)          | -9.80 to 42.1  | 1.22           | 0.223          |
| Time                                                   | -1.50 (0.45)         | -2.38 to -0.63 | -3.36          | 0.001*         |
| Group×Time                                             | 1.52 (0.76)          | 0.04 to 3.01   | 2.01           | 0.045*         |
| Baseline pain intensity                                | -1.11 (2.13)         | -5.28 to 3.06  | -0.52          | 0.601          |
| Postoperative pain intensity                           | 2.15 (1.12)          | -0.05 to 4.34  | 1.92           | 0.055          |
| Ethnicity                                              | -21.9 (25.7)         | -72.1 to 28.4  | -0.85          | 0.394          |

\*Statistical significance defined by  $p < 0.05$  without corrections. SE, standard error. CI, confidence interval. MADRS, Montgomery-Asberg Depression Rating Scale. HADS, Hospital Anxiety and Depression Scale. Pain intensity was rated on a 0-10 numeric scale. Baseline values were obtained during screening. Post-treatment values were obtained on postoperative days 1, 2, 3, 5, 7 and 14.

### **Caption for Supplemental Table 1. Model Estimates**

Model estimates for post-treatment MADRS and HADS scores and percent change in scores for placebo and ketamine arms, detailing the effects of baseline opioid use status, time, and additional predictors on the outcomes.
